# Supplementary material
Source: PubMed Central journal article supplement (PMC3421953)
Supplement: neo1407_0559SD1.pdf [file neo1407_0559SD1.pdf]

**Table W1.** Characteristics of 99 Patients.

| Variables                | No. Patients | %  |
|--------------------------|--------------|----|
| Sex                      |              |    |
| Male                     | 59           | 60 |
| Female                   | 40           | 40 |
| Age, years               |              |    |
| <60                      | 37           | 37 |
| ≥60                      | 62           | 63 |
| Tumor position           |              |    |
| Colon                    | 57           | 58 |
| Rectum                   | 42           | 42 |
| Differentiation          |              |    |
| Nonpoor                  | 95           | 96 |
| Poor*                    | 4            | 4  |
| T factor                 |              |    |
| Tis                      | 5            | 5  |
| T1                       | 15           | 15 |
| T2                       | 7            | 7  |
| T3                       | 68           | 69 |
| T4                       | 4            | 4  |
| N factor                 |              |    |
| N0                       | 55           | 56 |
| N1                       | 26           | 26 |
| N2                       | 18           | 18 |
| Distant metastasis       |              |    |
| Present                  | 23           | 23 |
| Absent                   | 76           | 77 |
| Peritoneal dissemination |              |    |
| Present                  | 5            | 5  |
| Absent                   | 94           | 95 |
| UICC stage               |              |    |
| I                        | 25           | 25 |
| II                       | 25           | 25 |
| III                      | 24           | 24 |
| IV                       | 25           | 25 |
| Lymphatic invasion       |              |    |
| Negative                 | 16           | 16 |
| Positive                 | 83           | 84 |
| Vascular invasion        |              |    |
| Negative                 | 23           | 23 |
| Positive                 | 76           | 77 |
| Preoperative CEA         |              |    |
| Normal (≤2.5 ng/ml)      | 56           | 57 |
| Elevated (>2.5 ng/ml)    | 43           | 43 |
| Preoperative CA19-9      |              |    |
| Normal (≤37 ng/ml)       | 71           | 72 |
| Elevated (>37 ng/ml)     | 28           | 28 |
| Q-MSP value              |              |    |
| <2.89                    | 43           | 43 |
| ≥2.89                    | 56           | 57 |

\*Poor includes poorly differentiated, mucinous, and undifferentiated types.

**Table W2.** Prognostic Analysis of Clinicopathologic Variables in 170 Patients with Stage III CRC.

| Variables                        | No. Patients | %     | 5-Year DSS*         |                       |                       |                       |
|----------------------------------|--------------|-------|---------------------|-----------------------|-----------------------|-----------------------|
|                                  |              |       | Univariate Analysis |                       | Multivariate Analysis |                       |
|                                  |              |       | HR (95% CI)         | <i>p</i> <sup>†</sup> | HR (95% CI)           | <i>p</i> <sup>†</sup> |
| Sex                              |              |       |                     |                       |                       |                       |
| Male                             | 97           | 57.1  | 1.12 (0.84-1.47)    | .438                  | n/d                   | n/d                   |
| Female                           | 73           | 42.9  |                     |                       |                       |                       |
| Age, years                       |              |       |                     |                       |                       |                       |
| <60                              | 74           | 43.5  | 0.97 (0.73-1.28)    | .818                  | n/d                   | n/d                   |
| ≥60                              | 96           | 56.5  |                     |                       |                       |                       |
| Tumor position                   |              |       |                     |                       |                       |                       |
| Colon                            | 96           | 56.5  | 0.89 (0.67-1.18)    | .406                  | n/d                   | n/d                   |
| Rectum                           | 74           | 43.5  |                     |                       |                       |                       |
| Differentiation                  |              |       |                     |                       |                       |                       |
| Nonpoor                          | 149          | 87.6  | 1.38 (0.93-1.93)    | .103                  | n/d                   | n/d                   |
| Poor <sup>‡</sup>                | 21           | 12.4  |                     |                       |                       |                       |
| T factor                         |              |       |                     |                       |                       |                       |
| T1, 2                            | 20           | 11.8  | 1.56 (0.95-3.17)    | .087                  | 1.36 (0.81-2.79)      | .275                  |
| T3, 4                            | 150          | 88.2  |                     |                       |                       |                       |
| N factor                         |              |       |                     |                       |                       |                       |
| N1                               | 119          | 70.0  | 1.98 (1.50-2.63)    | <.001                 | 1.92 (1.42-2.59)      | <.001                 |
| N2                               | 51           | 30.0  |                     |                       |                       |                       |
| Intramural lymphatic involvement |              |       |                     |                       |                       |                       |
| Negative                         | 0            | 0.0   | n/a                 | n/a                   | n/a                   | n/a                   |
| Positive                         | 170          | 100.0 |                     |                       |                       |                       |
| Intramural vascular involvement  |              |       |                     |                       |                       |                       |
| Negative                         | 7            | 4.1   | 693.7               | .023                  | n/d                   | n/d                   |
| Positive                         | 163          | 95.9  |                     |                       |                       |                       |
| Preoperative CEA                 |              |       |                     |                       |                       |                       |
| Normal (≤2.5 ng/ml)              | 103          | 60.6  | 1.81 (1.36-2.43)    | <.001                 | 1.51 (1.12-2.07)      | .008                  |
| Elevated (>2.5 ng/ml)            | 67           | 39.4  |                     |                       |                       |                       |
| Preoperative CA19-9              |              |       |                     |                       |                       |                       |
| Normal (≤37 ng/ml)               | 150          | 88.2  | 1.67 (1.16-2.29)    | .007                  | 1.12 (0.74-1.63)      | .582                  |
| Elevated (>37 ng/ml)             | 20           | 11.8  |                     |                       |                       |                       |
| Q-MSP value                      |              |       |                     |                       |                       |                       |
| <2.89                            | 85           | 50.0  | 1.35 (1.02-1.81)    | .037                  | 1.40 (1.02-1.92)      | .035                  |
| ≥2.89                            | 85           | 50.0  |                     |                       |                       |                       |

CI indicates confident interval; HR, hazard ratio; n/a, not applicable; n/d, not determined.

There was no event in intramural invasion-negative cases, so that this variable was excluded from multivariate analysis.

\*End point: date of death or March 31, 2007.

<sup>†</sup>Cox proportional hazard model.

<sup>‡</sup>Poor includes poorly differentiated, mucinous, and undifferentiated types.

**Table W3.** Sequences of Primers and Fluorescent Probes.

| Method               | Gene                | Forward (5'-3')            | Fluorescent Probe (5'-3')         | Reverse Primer (5'-3')     | Annealing Temperature (°C) |
|----------------------|---------------------|----------------------------|-----------------------------------|----------------------------|----------------------------|
| Bisulfite sequencing | <i>HO1X-β</i>       | TAGTTTGTGTTGGAGAGGGTTTAAAG |                                   | AACCTCCCTAAAAACAACCTTAAAC  | 62                         |
| TaqMan-Q-MSP         | <i>HO1X-β</i>       | TTTGGAGAGGGTTTTAAAGCG      | CGGAGATAGAAGGTGTTTTATCGGGGAGGTCTG | AACAACCTTAAACAATCGCGAA     | 60                         |
| TaqMan-Q-MSP         | <i>β-actin</i>      | TGGTGATGGAGGAGTTTAGTAAGT   | ACCACCACCAACACACAATAACAAACACA     | AACCAATAAACCTACTCCTCCCTTAA | 60                         |
| RT-PCR/qRT-PCR       | <i>HO1X-α and γ</i> | CAAACCCAGGGCTTGGCGCTT      |                                   | GCGGAGGAGAGAAAACAGAGAT     | 62                         |
| RT-PCR/qRT-PCR       | <i>HO1X-β</i>       | GGTCCCCCTTTGGGAGGAA        |                                   | GCGGAGGAGAGAAAACAGAGAT     | 62                         |
| RT-PCR/qRT-PCR       | <i>HO1X-core</i>    | CAGAGGACCAGGTGGAATCC       |                                   | GCGGAGGAGAGAAAACAGAGAT     | 62                         |
| qRT-PCR              | <i>PRDX2</i>        | GCAGTGACACGATTAAAGC        |                                   | TATCCGTTAGCCAGCCTA         | 60                         |
| qRT-PCR              | <i>WTAP</i>         | AGAACAGTCAGAGGCCACAAG      |                                   | TTCCCTGGAGAGAAAGGAAAG      | 55                         |
| qRT-PCR              | <i>FOS</i>          | TTACTACCACTCACCCGCCAGA     |                                   | GAATGAGTTGGCACTGGAGA       | 55                         |
| qRT-PCR              | <i>CYR61</i>        | CATGATGATCCAGTCCTG         |                                   | TTGAAACGCCTGTAGAAG         | 55                         |
| qRT-PCR              | <i>EPH42</i>        | CTGAGCGTATCTTCAATTG        |                                   | AATGGTGTCAATCTTGGT         | 60                         |
| qRT-PCR              | <i>SLC2A3</i>       | TCTATTACTCAACAGGAAT        |                                   | CAGTGAAGATAGTATTAAAC       | 55                         |
| qRT-PCR              | <i>EMP1</i>         | CTGGCAAGAGCAGATACT         |                                   | TTTGCTTTGGGTCAAGAAG        | 55                         |
| RT-PCR/qRT-PCR       | <i>β-actin</i>      | GCTCGTCGTCGACAACCGGCTC     |                                   | CAAACATGATCTGGGTCACTTCT    | 55/62                      |

**Table W5.** Downregulated Genes by HOPX in DNA Microarray at a Two-fold Ratio.

| Probe Set   | Gene Symbol                      | HCT116 Mock Signal | HCT116 HOPX Signal | DL1 Mock Signal | DL1 HOPX Signal | HCT116 Log <sub>2</sub> Ratio | DL1 Log <sub>2</sub> Ratio |
|-------------|----------------------------------|--------------------|--------------------|-----------------|-----------------|-------------------------------|----------------------------|
| 37028_at    | <i>PPP1R15A</i>                  | 136.5              | 62.2               | 1092            | 75.4            | -1.1                          | -3.9                       |
| 36829_at    | <i>PER1</i>                      | 262.1              | 101.7              | 403.3           | 55.8            | -1.4                          | -2.9                       |
| 242669_at   | <i>UFM1</i>                      | 219.3              | 60.8               | 161.7           | 64.7            | -1.9                          | -1.3                       |
| 239451_at   | —                                | 143                | 50                 | 169.2           | 50              | -1.5                          | -1.8                       |
| 230265_at   | <i>SEL1L</i>                     | 104.4              | 50                 | 182.1           | 84              | -1.1                          | -1.1                       |
| 229460_at   | <i>FAM126B</i>                   | 192.3              | 90.8               | 218.4           | 60.2            | -1.1                          | -1.9                       |
| 228234_at   | <i>TICAM2 III TMED7</i>          | 851.6              | 281                | 372.5           | 105.8           | -1.6                          | -1.8                       |
| 228173_at   | <i>GNAS</i>                      | 110.7              | 53.4               | 130.6           | 59.8            | -1.1                          | -1.1                       |
| 227747_at   | <i>MPZL3</i>                     | 148.7              | 70                 | 261.1           | 52.4            | -1.1                          | -2.3                       |
| 227404_s_at | <i>EGR1</i>                      | 339.7              | 93.6               | 695.6           | 154.4           | -1.9                          | -2.2                       |
| 227345_at   | <i>TNFRSF10D</i>                 | 843.5              | 247.6              | 693.4           | 234.1           | -1.8                          | -1.6                       |
| 227309_at   | <i>YOD1</i>                      | 703.4              | 264                | 785.5           | 133.5           | -1.4                          | -2.6                       |
| 226640_at   | <i>DAGLB</i>                     | 132.9              | 50                 | 133.8           | 50              | -1.4                          | -1.4                       |
| 226275_at   | <i>MXD1</i>                      | 101.3              | 50                 | 263.9           | 97.4            | -1.0                          | -1.4                       |
| 225832_s_at | <i>DAGLB</i>                     | 111                | 50                 | 129.6           | 50              | -1.2                          | -1.4                       |
| 225799_at   | <i>LOC541471 III NCRNA00152</i>  | 297.2              | 122.6              | 1208.7          | 263.4           | -1.3                          | -2.2                       |
| 225090_at   | <i>SYVN1</i>                     | 206.4              | 97.9               | 176.3           | 57.2            | -1.1                          | -1.6                       |
| 224797_at   | <i>ARRDC3</i>                    | 251.1              | 95.2               | 101.5           | 50              | -1.4                          | -1.0                       |
| 222690_s_at | <i>TMEM39A</i>                   | 268.7              | 104.3              | 353.1           | 101.3           | -1.4                          | -1.8                       |
| 222262_s_at | <i>ETNK1</i>                     | 223.4              | 91.8               | 334.6           | 84.3            | -1.3                          | -2.0                       |
| 222088_s_at | <i>SLC2A14 III SLC2A3</i>        | 1580.1             | 243                | 110.9           | 50              | -2.7                          | -1.1                       |
| 222018_at   | <i>NACA III NACA2 III NACAP1</i> | 201.5              | 93.9               | 267.9           | 100.8           | -1.1                          | -1.4                       |
| 217173_s_at | <i>LDLR</i>                      | 146.1              | 50                 | 102.1           | 50              | -1.5                          | -1.0                       |
| 216268_s_at | <i>JAG1</i>                      | 355                | 114                | 972.4           | 370.9           | -1.6                          | -1.4                       |
| 215222_x_at | <i>MACF1</i>                     | 211.6              | 64.6               | 133.2           | 60              | -1.7                          | -1.2                       |
| 214752_x_at | <i>FLNA</i>                      | 242.3              | 100                | 380             | 182.4           | -1.3                          | -1.1                       |
| 214683_s_at | <i>CLK1</i>                      | 338.3              | 94.8               | 726.9           | 249.6           | -1.8                          | -1.5                       |
| 214016_s_at | <i>SFPQ</i>                      | 936.4              | 415.3              | 1675            | 511.9           | -1.2                          | -1.7                       |
| 213746_s_at | <i>FLNA</i>                      | 254.6              | 66.9               | 313.9           | 145.4           | -1.9                          | -1.1                       |
| 212457_at   | <i>TFE3</i>                      | 164.6              | 69.1               | 355.4           | 152             | -1.3                          | -1.2                       |
| 212444_at   | —                                | 2573.1             | 1029.2             | 1157            | 466.8           | -1.3                          | -1.3                       |
| 210764_s_at | <i>CYR61</i>                     | 791.7              | 141.8              | 1948            | 51.7            | -2.5                          | -5.2                       |
| 210676_x_at | <i>RGPD5 III RGPD6 III RGPD8</i> | 180                | 72.7               | 605.6           | 187.6           | -1.3                          | -1.7                       |
| 210664_s_at | <i>TFPI</i>                      | 443.9              | 176.8              | 201.4           | 50.2            | -1.3                          | -2.0                       |
| 210346_s_at | <i>CLK4</i>                      | 130                | 57.1               | 309.9           | 112.3           | -1.2                          | -1.5                       |
| 209907_s_at | <i>ITSN2</i>                     | 173.3              | 84                 | 144.2           | 50              | -1.0                          | -1.5                       |
| 209305_s_at | <i>GADD45B</i>                   | 156.8              | 76.5               | 1576.8          | 102.5           | -1.0                          | -3.9                       |
| 209304_x_at | <i>GADD45B</i>                   | 192.5              | 79.2               | 1224.6          | 101.5           | -1.3                          | -3.6                       |
| 209270_at   | <i>LAMB3</i>                     | 1134.9             | 218.9              | 1541.6          | 646.7           | -2.4                          | -1.3                       |
| 209189_at   | <i>FOS</i>                       | 877.6              | 76                 | 1499.3          | 50              | -3.5                          | -4.9                       |
| 209099_x_at | <i>JAG1</i>                      | 399.1              | 103.5              | 1059            | 445.3           | -1.9                          | -1.2                       |
| 208744_x_at | <i>HSPH1</i>                     | 123                | 50                 | 2317.9          | 115.6           | -1.3                          | -4.3                       |
| 207574_s_at | <i>GADD45B</i>                   | 312.4              | 143.1              | 2184.9          | 176.2           | -1.1                          | -3.6                       |
| 206976_s_at | <i>HSPH1</i>                     | 801.6              | 289.5              | 7006.9          | 647             | -1.5                          | -3.4                       |
| 204733_at   | <i>KLK6</i>                      | 115.5              | 55.1               | 996.1           | 427.2           | -1.1                          | -1.2                       |
| 204363_at   | <i>F3</i>                        | 1017.9             | 394.9              | 343.8           | 157.7           | -1.4                          | -1.1                       |
| 203499_at   | <i>EPHA2</i>                     | 1002.5             | 219.9              | 1027.2          | 191.4           | -2.2                          | -2.4                       |
| 203397_s_at | <i>GALNT3</i>                    | 1004.9             | 375.3              | 696.5           | 235.3           | -1.4                          | -1.6                       |
| 203108_at   | <i>GPRC5A</i>                    | 4713.6             | 1335.8             | 1984.9          | 519.3           | -1.8                          | -1.9                       |
| 203021_at   | <i>SLPI</i>                      | 103.1              | 50                 | 433.1           | 106.5           | -1.0                          | -2.0                       |
| 202912_at   | <i>ADM</i>                       | 5707.9             | 1915.5             | 2337.8          | 1041.2          | -1.6                          | -1.2                       |
| 202842_s_at | <i>DNAJB9</i>                    | 465.9              | 194.5              | 779.2           | 197             | -1.3                          | -2.0                       |
| 202771_at   | <i>FAM38A</i>                    | 672.6              | 323                | 566.1           | 249.3           | -1.1                          | -1.2                       |
| 202733_at   | <i>P4HA2</i>                     | 1168.1             | 357.6              | 1595.5          | 513             | -1.7                          | -1.6                       |
| 202679_at   | <i>NPC1</i>                      | 1602               | 357                | 893.5           | 230.7           | -2.2                          | -2.0                       |
| 202558_s_at | <i>HSPA13</i>                    | 483.1              | 127.5              | 245.3           | 50              | -1.9                          | -2.3                       |
| 202499_s_at | <i>SLC2A3</i>                    | 4317.3             | 628.8              | 318.1           | 50              | -2.8                          | -2.7                       |
| 202497_x_at | <i>SLC2A3</i>                    | 1223.2             | 159.1              | 112             | 50              | -2.9                          | -1.2                       |
| 202185_at   | <i>PLOD3</i>                     | 919.6              | 339.2              | 800.5           | 344.1           | -1.4                          | -1.2                       |
| 202130_at   | <i>RIOK3</i>                     | 1233.7             | 535.7              | 1550.9          | 665.4           | -1.2                          | -1.2                       |
| 202067_s_at | <i>LDLR</i>                      | 219.3              | 50                 | 205.3           | 86.2            | -2.1                          | -1.3                       |
| 201939_at   | <i>PLK2</i>                      | 806.2              | 350.8              | 693.3           | 323.3           | -1.2                          | -1.1                       |
| 201694_s_at | <i>EGR1</i>                      | 1635.6             | 416.5              | 4085.5          | 527.7           | -2.0                          | -3.0                       |
| 201693_s_at | <i>EGR1</i>                      | 393.5              | 114.7              | 1281.7          | 104             | -1.8                          | -3.6                       |
| 201531_at   | <i>ZFP36</i>                     | 555.6              | 233.7              | 917.6           | 164.5           | -1.2                          | -2.5                       |
| 201465_s_at | <i>JUN</i>                       | 115.7              | 50                 | 661.4           | 114.8           | -1.2                          | -2.5                       |
| 201464_x_at | <i>JUN</i>                       | 730.5              | 298.1              | 3342.3          | 857.3           | -1.3                          | -2.0                       |
| 201325_s_at | <i>EMP1</i>                      | 878.7              | 118.1              | 250.7           | 50              | -2.9                          | -2.3                       |
| 201324_at   | <i>EMP1</i>                      | 2645.2             | 498                | 797.3           | 58.1            | -2.4                          | -3.8                       |
| 201289_at   | <i>CYR61</i>                     | 1482.8             | 284.7              | 3062.1          | 131.6           | -2.4                          | -4.5                       |
| 201041_s_at | <i>DUSP1</i>                     | 618.7              | 280.2              | 1524.8          | 181.1           | -1.1                          | -3.1                       |
| 200924_s_at | <i>LOC442497 III SLC3A2</i>      | 488.1              | 242.8              | 2518.9          | 589.5           | -1.0                          | -2.1                       |

Table W5. (continued)

| Probe Set    | Gene Symbol              | HCT116 Mock Signal | HCT116 HOPX Signal | DLD1 Mock Signal | DLD1 HOPX Signal | HCT116 Log <sub>2</sub> Ratio | DLD1 Log <sub>2</sub> Ratio |
|--------------|--------------------------|--------------------|--------------------|------------------|------------------|-------------------------------|-----------------------------|
| 200859_x_at  | <i>FLNA</i>              | 458.4              | 103.5              | 645.2            | 259              | -2.1                          | -1.3                        |
| 200825_s_at  | <i>HYOU1</i>             | 536.4              | 189.5              | 920.8            | 221.8            | -1.5                          | -2.1                        |
| 200799_at    | <i>HSPA1A III HSPA1B</i> | 138.1              | 50                 | 398              | 50               | -1.5                          | -3.0                        |
| 1554462_a_at | <i>DNAJB9</i>            | 118                | 54.3               | 144.4            | 59.3             | -1.1                          | -1.3                        |
| 1007_s_at    | <i>DDR1</i>              | 852.1              | 320.8              | 451.6            | 174.4            | -1.4                          | -1.4                        |

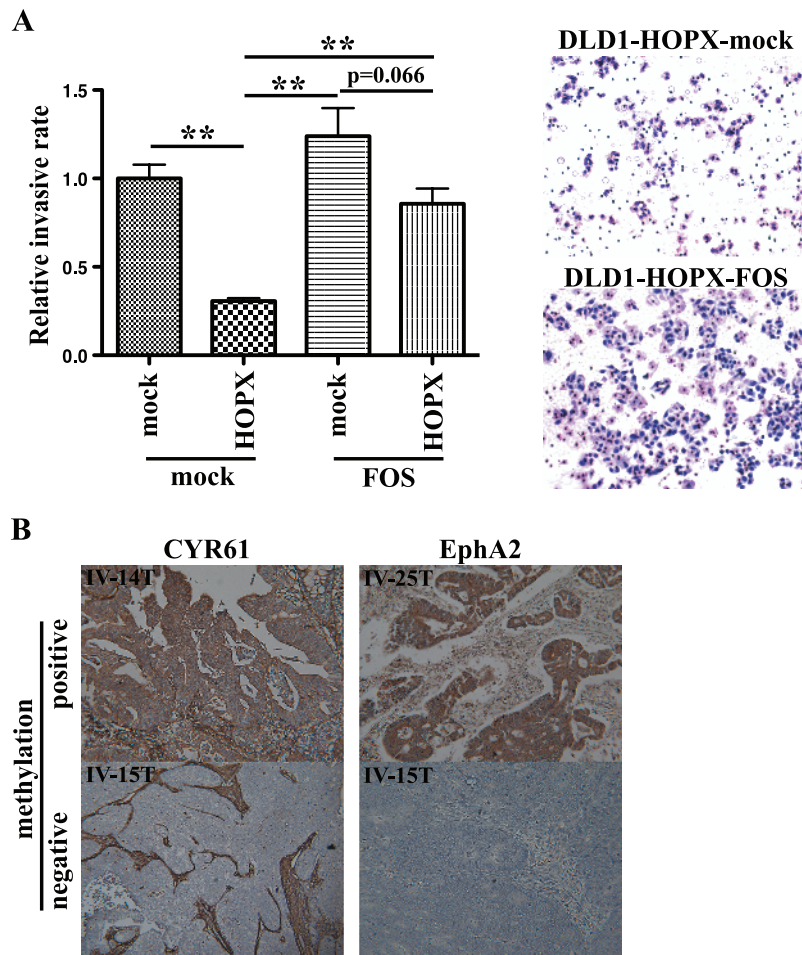

**Figure W1.** (A) Matrigel invasion assay in double transfectants (mock-mock, HOPX-mock, mock-FOS, and HOPX-FOS). After fixation and staining, invading cells were photographed (right) and counted at 100 $\times$  magnification. Left: Data are expressed relative to mean invading cells of mock-mock double transfectant. Cell growth for 22 hours determined by the WST-1 assay was similar (data not shown). Two independent experiments were done in triplicate, and values indicate means  $\pm$  SEM. \*\* $P < .001$ . Error bars, SEM. (B) Representative immunohistochemistry of CYR61 and EPHA2 in CRC with low and high Q-MSP value of HOPX- $\beta$  (original magnification,  $\times 100$ ). Of note, CYR61 is expressed in stroma of all CRC samples but is suppressed in epithelial cells in CRC with low Q-MSP value (left bottom).

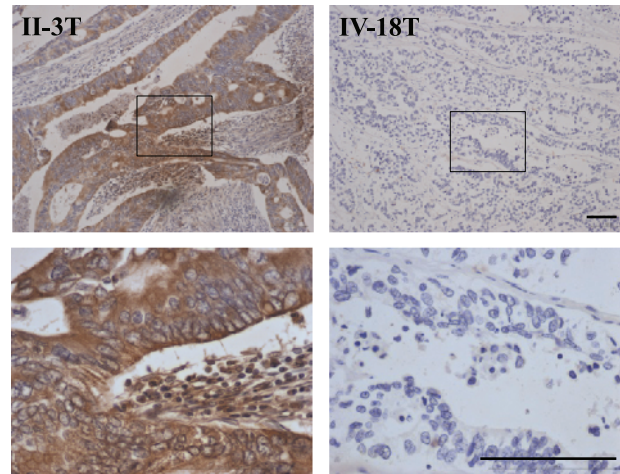

**Figure W2.** Representative immunohistochemistry of HOPX in well-differentiated CRC with a low Q-MSP value (0.6) of HOPX- $\beta$  (left) and poor differentiated CRC with a high Q-MSP value (35.1) of HOPX- $\beta$  (right). Bars, 100  $\mu$ m.

**Table W6.** Correlation Analysis of Clinicopathologic Variables in Stage III CRC with Methylation Status of HOPX- $\beta$ .

| Variables                        | Patient No. | HOPX- $\beta$ Promoter Hypermethylation |          |                   | <i>P</i> * | Multivariate Analysis |                       |
|----------------------------------|-------------|-----------------------------------------|----------|-------------------|------------|-----------------------|-----------------------|
|                                  |             | Positive                                | Negative | Positive Rate (%) |            | OR (95% CI)           | <i>P</i> <sup>†</sup> |
| Sex                              |             |                                         |          |                   |            |                       |                       |
| Male                             | 97          | 48                                      | 49       | 49.5              | >.999      | 0.80 (0.41-1.54)      | .511                  |
| Female                           | 73          | 37                                      | 36       | 50.7              |            |                       |                       |
| Age, years                       |             |                                         |          |                   |            |                       |                       |
| <60                              | 74          | 36                                      | 38       | 48.6              | .877       | 1.13 (0.58-2.18)      | .722                  |
| $\geq$ 60                        | 96          | 49                                      | 47       | 51.0              |            |                       |                       |
| Tumor position                   |             |                                         |          |                   |            |                       |                       |
| Colon                            | 96          | 48                                      | 48       | 50.0              | >.999      | 0.99 (0.51-1.91)      | .968                  |
| Rectum                           | 74          | 37                                      | 37       | 50.0              |            |                       |                       |
| Differentiation                  |             |                                         |          |                   |            |                       |                       |
| Nonpoor                          | 149         | 70                                      | 79       | 47.0              | .060       | 4.05 (1.40-13.34)     | .014                  |
| Poor                             | 21          | 15                                      | 6        | 71.4              |            |                       |                       |
| T factor                         |             |                                         |          |                   |            |                       |                       |
| T1, 2                            | 20          | 9                                       | 11       | 45.0              | .813       | 1.23 (0.42-3.69)      | .710                  |
| T3, 4                            | 150         | 76                                      | 74       | 50.7              |            |                       |                       |
| N factor                         |             |                                         |          |                   |            |                       |                       |
| N1                               | 119         | 64                                      | 55       | 53.8              | .180       | 0.47 (0.20-1.11)      | .091                  |
| N2                               | 51          | 21                                      | 30       | 41.2              |            |                       |                       |
| Intramural lymphatic involvement |             |                                         |          |                   |            |                       |                       |
| Negative                         | 0           | 0                                       | 0        | 0.0               | n/a        | n/a                   | n/a                   |
| Positive                         | 170         | 85                                      | 85       | 50.0              |            |                       |                       |
| Intramural vascular involvement  |             |                                         |          |                   |            |                       |                       |
| Negative                         | 7           | 4                                       | 3        | 57.1              | >.999      | 0.84 (0.13-5.24)      | .853                  |
| Positive                         | 163         | 81                                      | 82       | 49.7              |            |                       |                       |
| Preoperative CEA                 |             |                                         |          |                   |            |                       |                       |
| Normal ( $\leq$ 2.5 ng/ml)       | 103         | 46                                      | 57       | 44.7              | .116       | 1.68 (0.84-3.42)      | .147                  |
| Elevated (>2.5 ng/ml)            | 67          | 39                                      | 28       | 58.2              |            |                       |                       |
| Preoperative CA19-9              |             |                                         |          |                   |            |                       |                       |
| Normal ( $\leq$ 37 ng/ml)        | 150         | 70                                      | 80       | 46.7              | .030       | 3.32 (1.09-11.68)     | .044                  |
| Elevated (>37 ng/ml)             | 20          | 15                                      | 5        | 75.0              |            |                       |                       |

OR, odds ratio.

\*Fischer exact test.

<sup>†</sup>Multivariate logistic regression analysis.
